# Supplementary material for: Enhanced energy density of polymer nanocomposites at a low electric field through aligned BaTiO3 nanowires
Source: Royal Society of Chemistry journal article supplement (doi:10.1039/c7ta00513j), 2017-01-01
Supplement: c7ta00513j1.pdf [file c7ta00513j1.pdf]

## Supporting Information

### Enhanced energy density of polymer nanocomposites at a lower electric field through aligned BaTiO<sub>3</sub> nanowires

Bing Xie<sup>a</sup>, Haibo Zhang<sup>b,c</sup>, Qi Zhang<sup>d</sup>, Jiadong Zang<sup>e</sup>, Chao Yang<sup>f</sup>, Qingping Wang<sup>a</sup>, Mingyu Li<sup>a</sup>, Shenglin Jiang<sup>a,\*</sup>

<sup>a</sup>*School of Optical and Electronic Information, Huazhong University of Science and Technology, Wuhan 430074, P. R. China*

<sup>b</sup>*College of Materials Science and Engineering, State Key Laboratory of Material Processing and Die and Mould Technology, Huazhong University of Science and Technology, Wuhan 430074, P. R. China*

<sup>c</sup>*Research Institute of Huazhong University of Science and Technology in Shenzhen, Shenzhen 518057, P. R. China*

<sup>d</sup>*School of Materials Science and Engineering, The University of New South Wales, New South Wales 2052, Australia*

<sup>e</sup>*School of Materials Science, Technical University of Darmstadt, Darmstadt 64287, Germany*

<sup>f</sup>*School of Physics, Huazhong University of Science and Technology, Wuhan 430074, P. R. China*

Table S1 Comparisons of energy density for different ferroelectric nanocomposites.

| Nanofiller                        | Matrix             | $E$ (kV/cm) | $U_e$ (J/cm <sup>3</sup> ) | Reference |
|-----------------------------------|--------------------|-------------|----------------------------|-----------|
| (3vol.%)BTnws// E                 | P(VDF-CTFE)        | 2400        | 10.8                       | Our work  |
| (18vol.%)BZT nps                  | PVDF               | 2500        | 7.74                       | 1         |
| (3vol.%)BTnws                     | P(VDF-CTFE)        | 2700        | 8.4                        | 2         |
| (17.5vol.%)BTnws                  | P(VDF-TrFE-CFE)    | 3000        | 10.48                      | 3         |
| (2.5vol.%)BT@SiO <sub>2</sub> nfs | PVDF               | 3300        | 6.28                       | 4         |
| (2vol.%)BT@SiO <sub>2</sub> nps   | PVDF               | 3400        | 6.28                       | 5         |
| (2.5vol.%)BST60 nfs               | PVDF               | 3800        | 6.4                        | 6         |
| (2.5vol.%)ST@PVP nfs              | PVDF               | 3800        | 6.8                        | 7         |
| (2.5vol.%)BST nfs                 | PVDF               | 3800        | 6.95                       | 8         |
| (10vol.%)F4CBT nps                | PVDF               | 4000        | 9.4                        | 9         |
| BTONps+BTONfs                     | PVDF(Multilayered) | 4500        | 10                         | 10        |
| MgO                               | PVDF               | 5000        | 10.52                      | 11        |

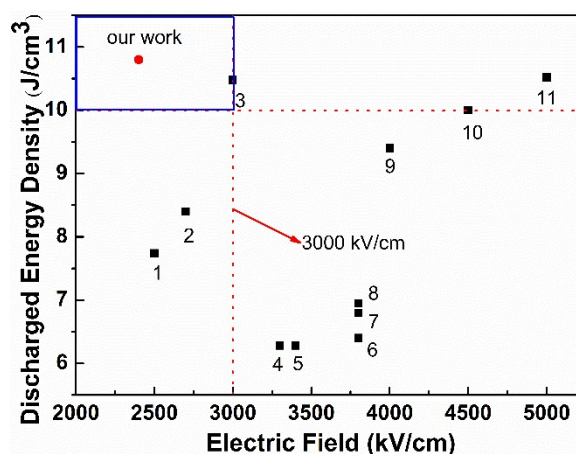

Fig.S1 Comparisons of energy density for different polymer nanocomposites at different electric field.

1. S. Adireddy, V. S. Puli, T. J. Lou, R. Elupula, S. C. Sklare, B. C. Riggs and D. B. Chrisey, *J. Sol-gel Sci. Techn.*, 2014, **73**, 641-646.
2. B. Xie, Q. Zhang, H. Zhang, G. Zhang, S. Qiu and S. Jiang, *Ceram. Int.*, 2016, **42**, 19012-19018.
3. H. Tang, Y. Lin and H. A. Sodano, *Adv. Energy Mater.*, 2013, **3**, 451-456.
4. S. Liu, S. Xue, B. Shen and J. Zhai, *Appl. Phys.Lett.*, 2015, **107**, 032907.
5. K. Yu, Y. Niu, Y. Bai, Y. Zhou and H. Wang, *Appl. Phys. Lett.*, 2013, **102**.
6. L. Shaohui, Z. Jiwei, W. Jinwen, X. Shuangxi and Z. Wenqin, *ACS. Appl. Mater. Interfaces.*, 2014, **6**, 1533-1540.
7. S. Liu and J. Zhai, *J. Mater. Chem. A*, 2015, **3**, 1511-1517.
8. Z. B. Pan, L. M. Yao, J. W. Zhai, S. H. Liu, K. Yang, H. T. Wang and J. H. Liu, *Ceram. Int.*, 2016, **42**, 14667-14674.
9. Y. Niu, K. Yu, Y. Bai, F. Xiang and H. Wang, *Rsc Adv.*, 2015, **5**, 64596-64603.

10. P. Hu, Y. Shen, Y. Guan, X. Zhang, Y. Lin, Q. Zhang and C.-W. Nan, *Adv. Funct. Mater.*, 2014, **24**, 3172-3178.
11. S.-s. Chen, J. Hu, L. Gao, Y. Zhou, S.-m. Peng, J.-l. He and Z.-m. Dang, *RSC Adv.*, 2016, **6**, 33599-33605.
